# Supplementary material
Source: publisher figshare collection journal article supplement (https://acs.figshare.com/ndownloader/files/4145740)
Supplement: Supplementary file 1 [file 4145740]

Electronic Supporting Information for:

# Water-Dispersible, Sulfonated Hyperbranched Poly(ether-ketone) Grafted Multi-Walled Carbon Nanotubes as Oxygen Reduction Catalysts

*Gyung-Joo Sohn,<sup>†</sup> Hyun-Jung Choi,<sup>†</sup> In-Yup Jeon,<sup>†</sup> Dong Wook Chang,<sup>†,#</sup> Liming Dai,<sup>‡</sup>  
Jong-Beom Baek<sup>\*†</sup>*

*<sup>†</sup> Interdisciplinary School of Green Energy/Low-Dimensional Carbon Materials Center,  
Ulsan National Institute of Science and Technology (UNIST), 100 Banyeon, Ulsan, 689-  
798, South Korea*

*Tel: +82-52-217-2510; Fax: +82-52-217-2019; Email: [jbbaek@unist.ac.kr](mailto:jbbaek@unist.ac.kr)*

*<sup>#</sup> Department of Chemical Systematic Engineering, Catholic University of Daegu, 13-13,  
Hayang, Gyungbuk, 712-702, South Korea*

*<sup>‡</sup> Department of Macromolecular Science and Engineering, Case Western Reserve  
University, 10900 Euclid Avenue, Cleveland, Ohio 44106, USA*

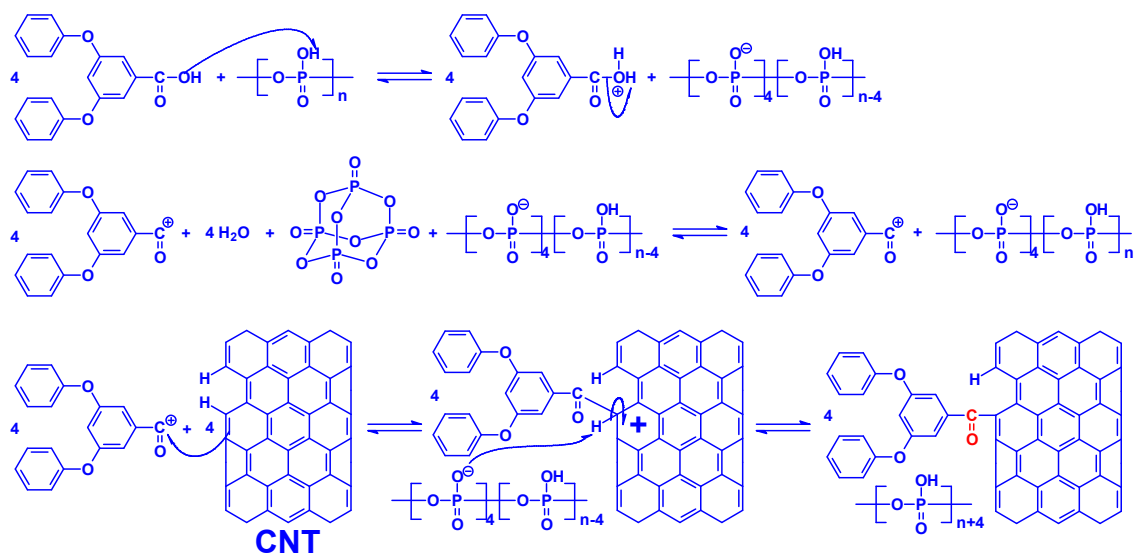

**Figure S1.** Proposed mechanism of Friedel-Crafts acylation reaction in PPA/P<sub>2</sub>O<sub>5</sub> medium, showing defect-selectively grafting of AB<sub>2</sub> monomer to the site of sp<sup>2</sup> hybrid C-H on CNT defects (The structure of CNT was simplified for easy understanding).

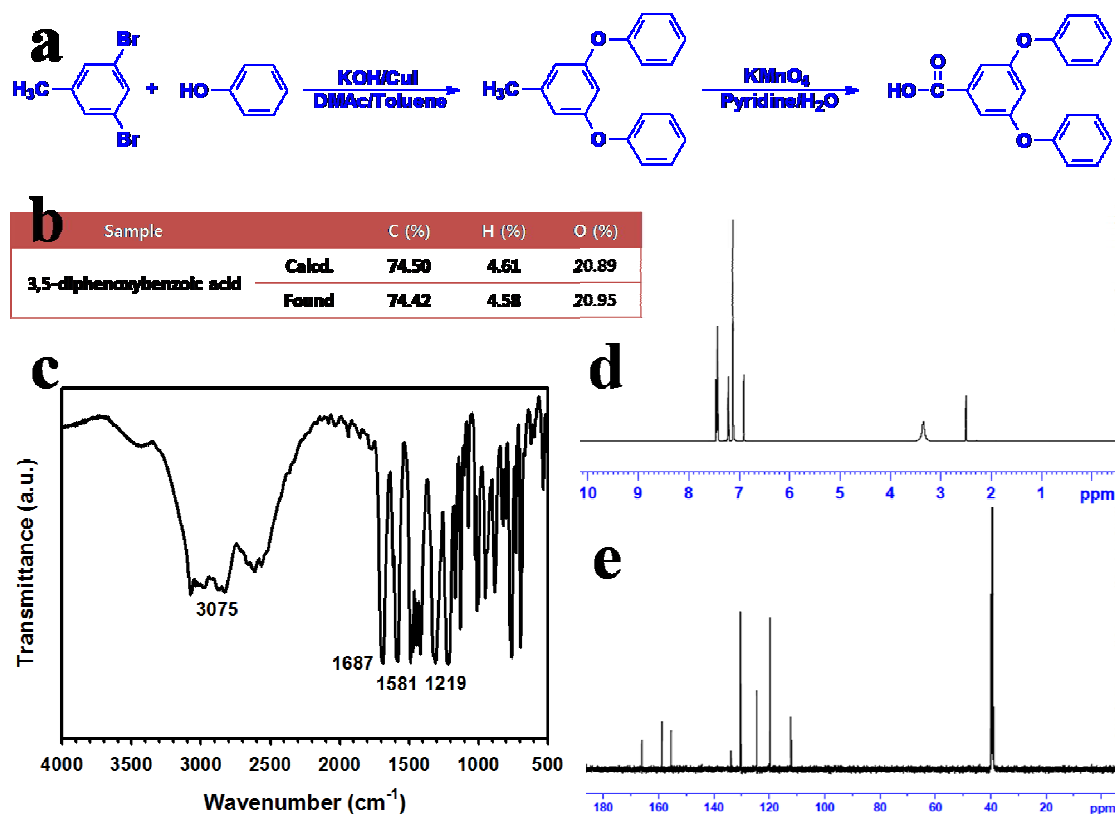

**Figure S2.** (a) Synthesis of AB<sub>2</sub> monomer , 3,5-diphenoxybenzoic acid, starting from 3,5-dibromotoluene and phenol; (b) elemental analysis of pure 3,5-diphenoxybenzoic acid; (c) FT-IR spectrum (KBr pellet) of 3,5-diphenoxybenzoic acid; (d) <sup>1</sup>H NMR (DMSO-d<sub>6</sub>) spectrum of 3,5-diphenoxybenzoic acid; (e) <sup>13</sup>C NMR (DMSO-d<sub>6</sub>) spectrum of 3,5-diphenoxybenzoic acid.

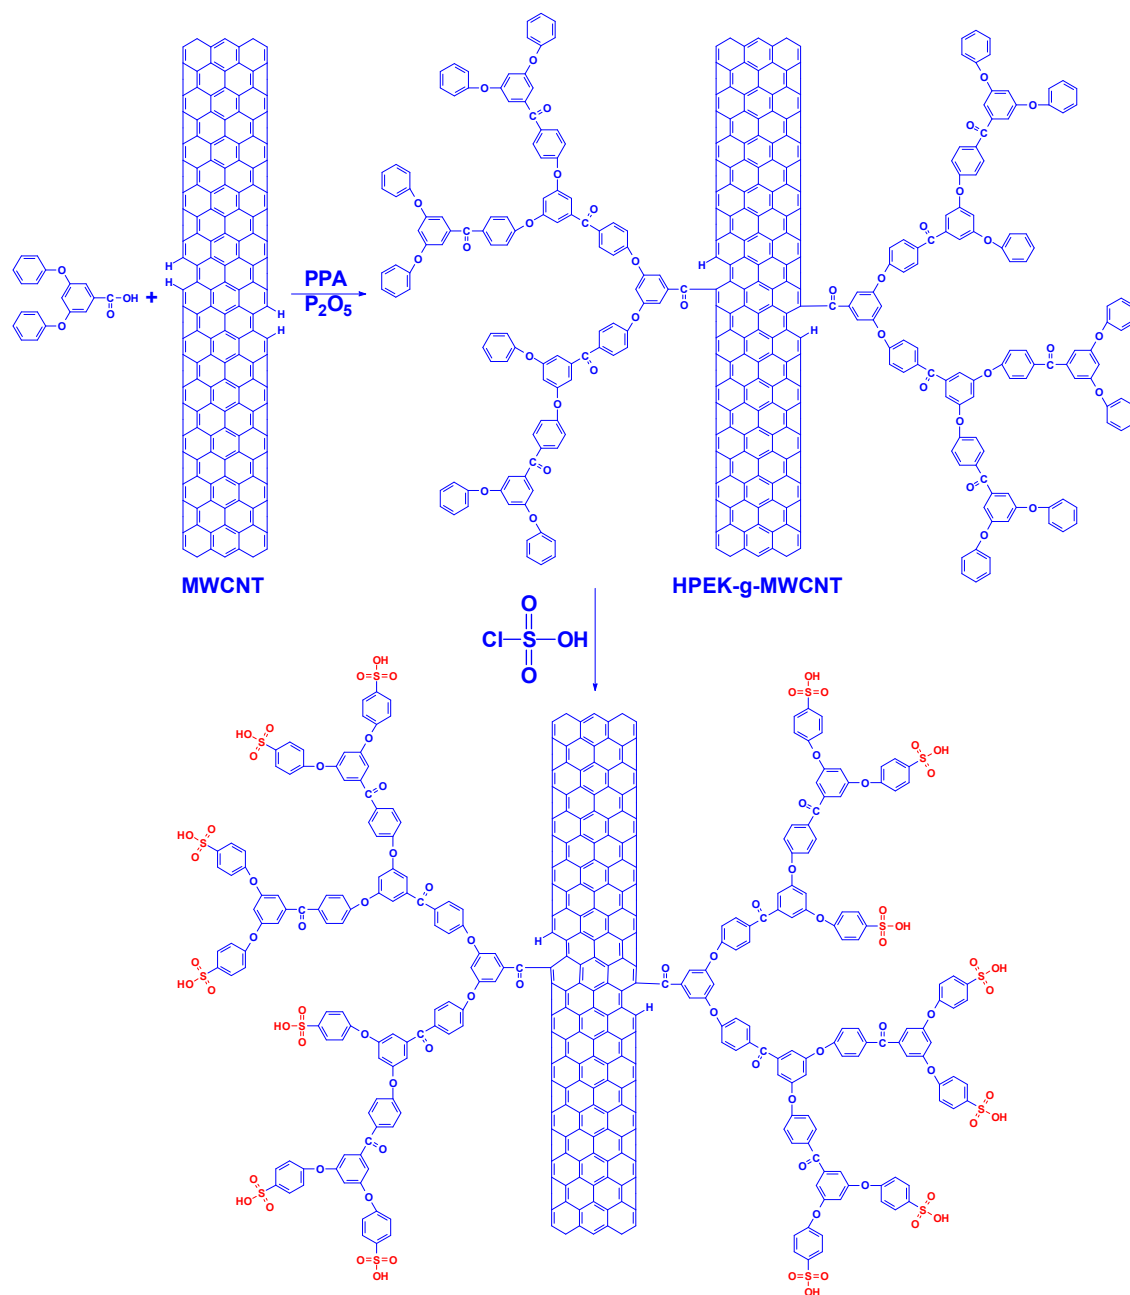

**Figure S3.** Schematic presentation of HPEK grafted MWCNT (HPEK-g-MWCNT) in PPA/ $\text{P}_2\text{O}_5$  medium and subsequent sulfonation of HPEK-g-MWCNT in chlorosulfonic acid to produce sulfonated HPEK-g-MWCNT (SHPEK-g-MWCNT).

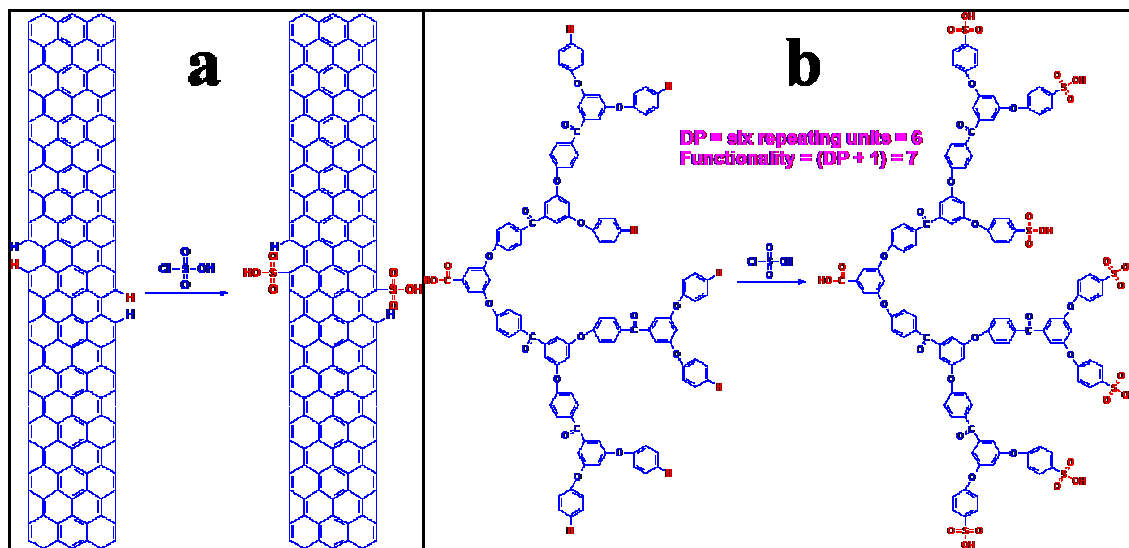

**Figure S4.** (a) Direct sulfonation of MWCNT in chlorosulfonic acid to yield sulfonated MWCNT (S-MWCNT). The sulfonation should be to the site of  $sp^2$  hybrid C-H on MWCNT defects; (b) the structure of HPEK with six repeating units (the degree of polymerization (DP) = 6) and sulfonation of HPEK in chlorosulfonic acid. The available reactive sites for the sulfonation are  $DP + 1 = 7$ . Thus, grafting HPEK to the surface of MWCNT could increase as much as average number of HPEK molecules ( $n$ ) per MWCNT multiplied by average degree of polymerization (DP) + 1, i.e.,  $n(DP + 1)$ . For example, if  $n$  is 10 and DP is 99,  $n(DP + 1)$  becomes 1000. As a result, 1000 of sulfonic acids could be introduced to the HPEK-g-MWCNT to produce SHPEK-g-MWCNT, which could provide enough hydrophilicity for water dispersion.

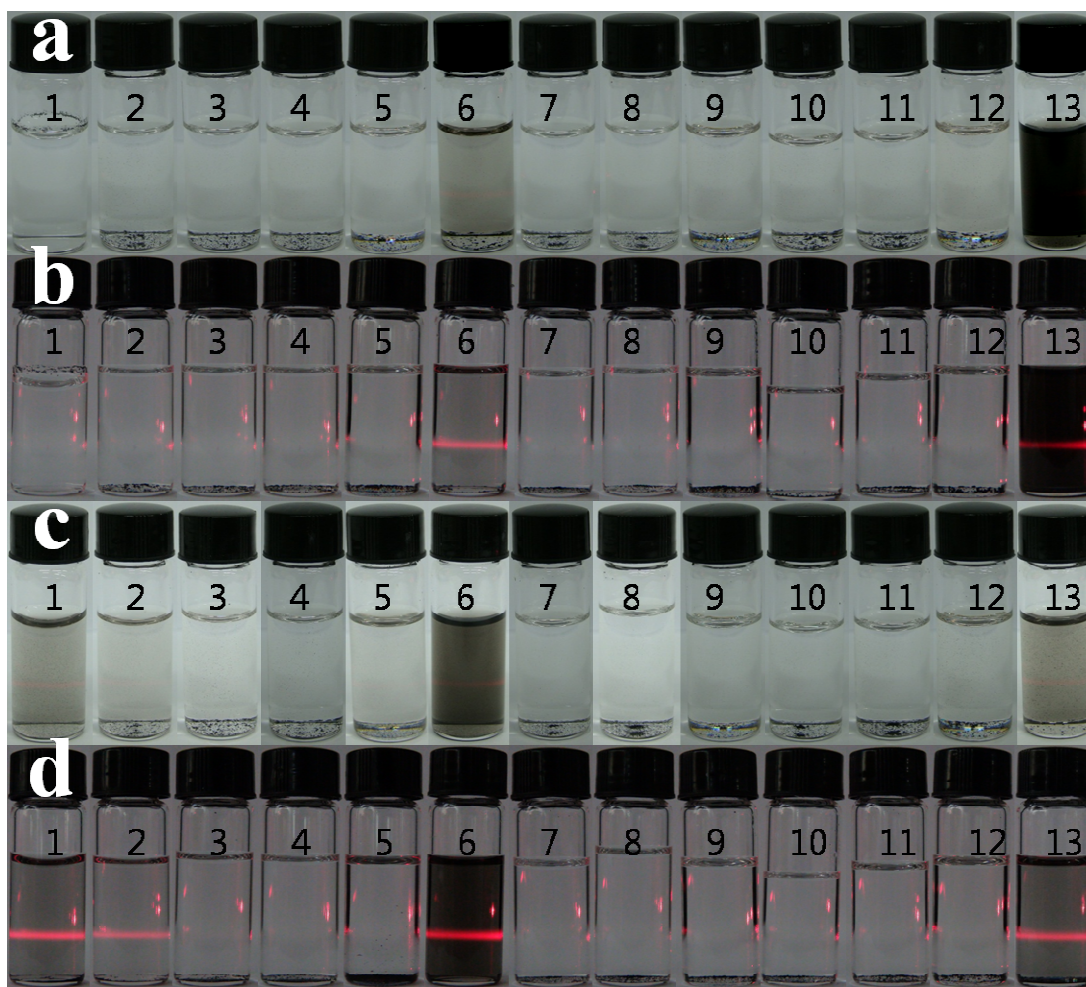

**Figure S5.** Photographs of samples dispersed in different solvents: (a) as-prepared HPEK-g-MWNT solutions without hand held laser shining; (b) HPEK-g-MWCNT solutions after one week at ambient condition with hand held laser shining; (c) as-prepared SHPEK-g-MWCNT solutions with hand held laser shining (d) SHPEK-g-MWCNT solutions after one week at ambient condition with hand held laser shining. (1) distilled water, (2) methanol, (3) ethanol, (4) acetic acid, (5) toluene, (6) DMAc, (7) heptane, (8) acetone, (9) benzene, (10) dichloromethane, (11) THF, (12) pyridine, and (13) NMP.

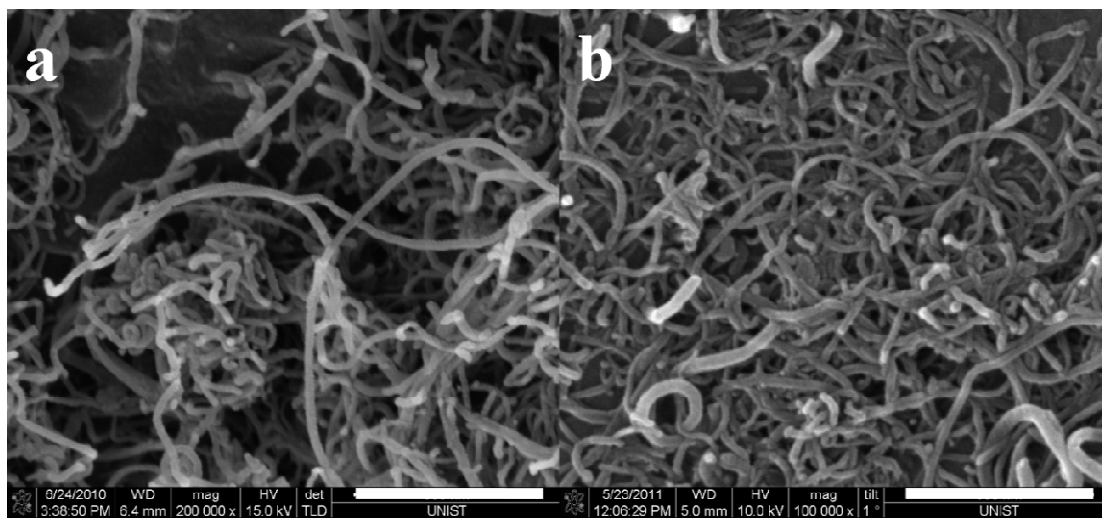

**Figure S6.** SEM images: (a) pristine MWCNT; (b) SHPEK-g-MWCNT. Scale bars are 0.5  $\mu$ m.

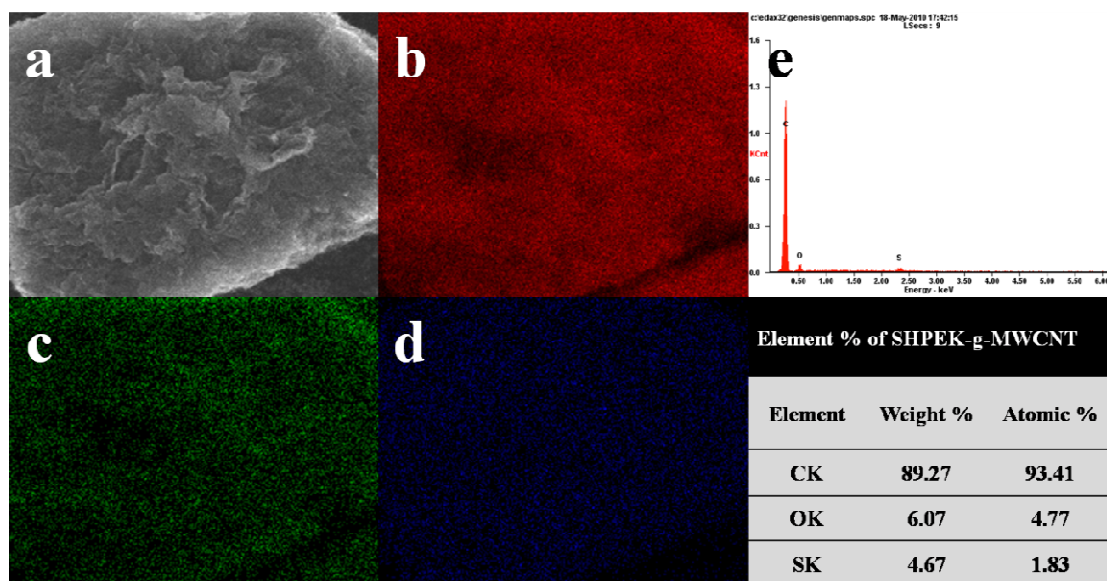

**Figure S7.** (a) SEM image of SHPEK-g-MWCNT; element mappings of SHPEK-g-MWCNT (b) C; (c) O; (d) S; (e) EDX spectrum and element percentages of SHPEK-g-MWCNT, indicating sulfur is uniformly distributed.



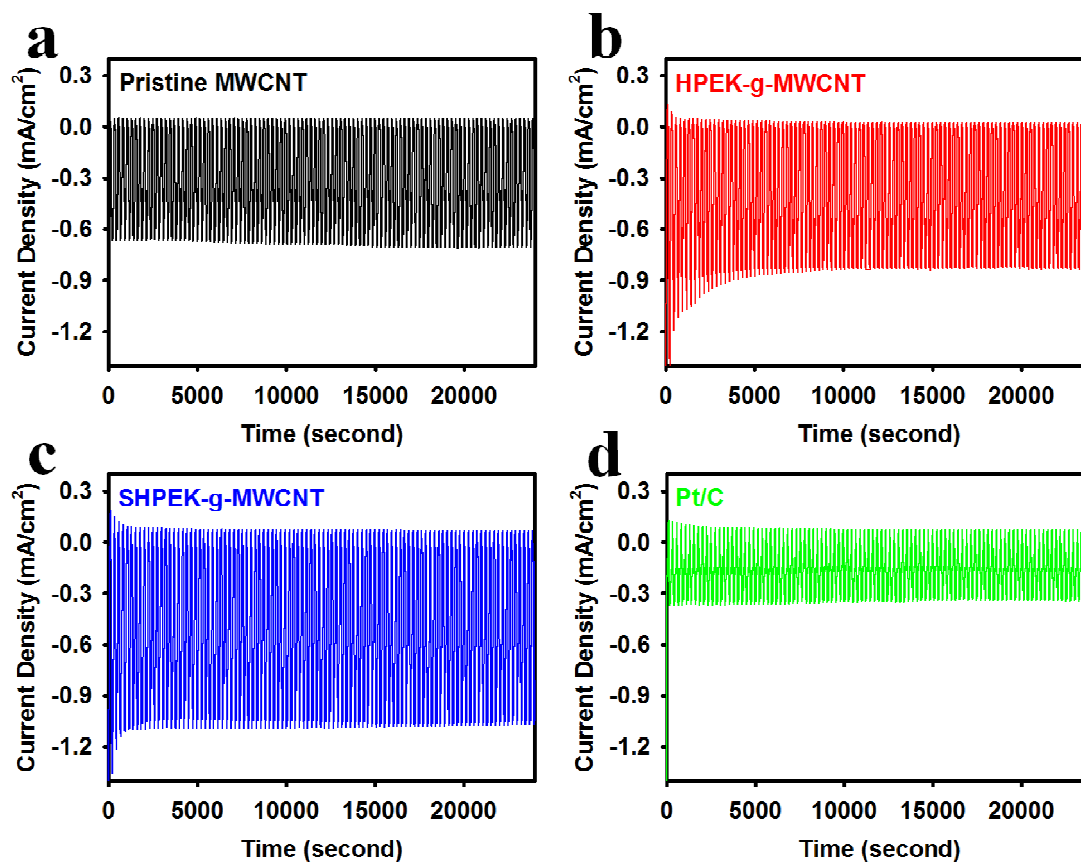

**Figure S8.** Current vs. time (*i-t*) curves obtained for 24,000 seconds showing cycling current stability: (a) pristine MWCNT; (b) HPEK-g-MWCNT; (c) SHPEK-g-MWCNT; (d) Pt/C.

**Table S1.** Elemental analysis of pristine MWCNT, HPEK-g-MWNCT and SHPEK-g-MWCNT

| Sample         |       | Elemental Analysis |       |       |       |     |     |
|----------------|-------|--------------------|-------|-------|-------|-----|-----|
|                |       | C (%)              | H (%) | O (%) | S (%) | C/H | C/S |
| Pristine MWCNT | Calc. | 100.0              | 0.0   | 0.0   | 0.0   |     |     |
|                | Found | 98.2               | 0.3   | BDL*  | 0.0   | 28  |     |
| S-MWCNT        | Found | 96.12              | 0.13  | 1.90  | 0.3   |     | 855 |
| HPEK-g-MWCNT   | Calc. | 96.91              | 0.66  | 2.42  | 0.0   |     |     |
|                | Found | 94.95              | 0.65  | 4.39  | 0.0   |     |     |
| SHPEK-g-MWCNT  | Calc. | 91.41              | 0.85  | 5.80  | 1.94  |     |     |
|                | Found | 86.21              | 0.76  | 9.03  | 2.07  |     | 85  |

\* BDL = below detection limit.

**Table S2.** The relationship between Zeta potential and colloidal stability<sup>1</sup>

| <b>Zeta Potential [mV]</b> | <b>Stability behavior of the colloid</b> |
|----------------------------|------------------------------------------|
| from 0 to $\pm 5$          | Rapid coagulation or flocculation        |
| from $\pm 10$ to $\pm 30$  | Incipient instability                    |
| from $\pm 30$ to $\pm 40$  | Moderate stability                       |
| from $\pm 40$ to $\pm 60$  | Good stability                           |
| more than $\pm 61$         | Excellent stability                      |

---

<sup>1</sup> [http://en.wikipedia.org/wiki/Zeta\\_potential](http://en.wikipedia.org/wiki/Zeta_potential)

**Table S3.** Onset potential, current density, and capacitance (F/g) obtained from the 50<sup>th</sup> cycle of CV in nitrogen- and oxygen-saturated 0.1 M KOH solution

| Sample               | Onset Potential<br>(V) | Current Density<br>(mA/cm <sup>2</sup> ) | Capacitance (F/g) |                |
|----------------------|------------------------|------------------------------------------|-------------------|----------------|
|                      |                        |                                          | N <sub>2</sub>    | O <sub>2</sub> |
| Pristine MWCNT       | -0.22                  | -0.66                                    | 22.5              | 60.0           |
| HPEK-g-MWCNT         | -0.22                  | -0.87                                    | 36.1              | 68.0           |
| SHPEK-g-MWCNT        | -0.18                  | -1.10                                    | 54.8              | 151.0          |
| Pt/C (Vulcan XC-72R) | -0.06                  | -0.37                                    | 81.0              | 85.1           |

**Table S4.** Kinetic current ( $j_k$ ) and average number of electrons transferred for oxygen reduction ( $n_i$ ) at different potentials for heat-treated graphene in oxygen-saturated 0.1 M KOH solution

| Sample               | $i$ | $E_i$ (V) vs Ag/AgCl | $n_i$ |
|----------------------|-----|----------------------|-------|
| Pristine MWCNT       | 1   | -0.4                 | 2.0   |
|                      | 2   | -0.5                 | 2.0   |
|                      | 3   | -0.6                 | 2.1   |
| HPEK-g-MWCNT         | 1   | -0.4                 | 2.0   |
|                      | 2   | -0.5                 | 2.0   |
|                      | 3   | -0.6                 | 2.1   |
| SHPEK-g-MWCNT        | 1   | -0.4                 | 3.7   |
|                      | 2   | -0.5                 | 3.7   |
|                      | 3   | -0.6                 | 3.8   |
| Pt/C (Vulcan XC-72R) | 1   | -0.4                 | 4.0   |
|                      | 2   | -0.5                 | 4.0   |
|                      | 3   | -0.6                 | 3.9   |
